# Supplementary material
Source: bioRxiv or medRxiv preprint supplement (https://medrxiv.org/highwire/filestream/71575/field_highwire_adjunct_files/0/2020.01.27.20018689-1.pdf)
Supplement: Supplementary file [file 2020.01.27.20018689-1.pdf]

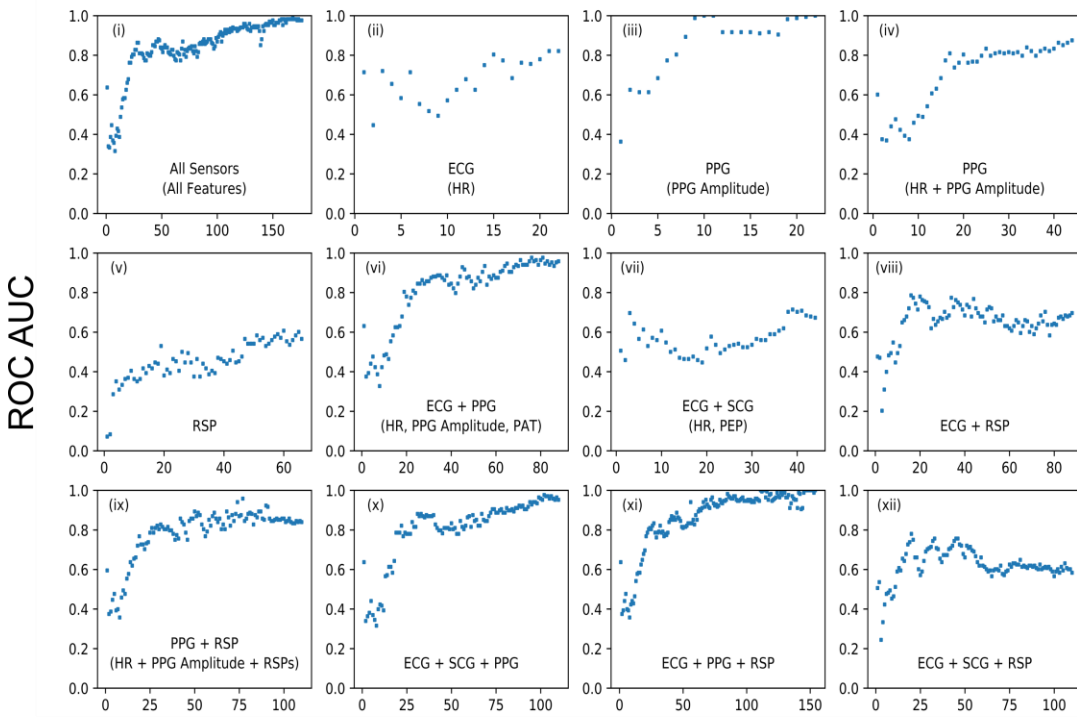

Number of Top Features Used in Machine Learning

Fig. S1. ROC AUC versus Top Feature comparison of reasonable sensor combinations.
